# Supplementary material for: Curcumin sensitizes pancreatic cancer cells to gemcitabine by attenuating PRC2 subunit EZH2, and the lncRNA PVT1 expression
Source: Oxford University Press journal article supplement (doi:10.1093/carcin/bgx065), 2017-06-19
Supplement: bgx065_suppl_supplementary_figure_legends.docx [file bgx065_suppl_supplementary_figure_legends.docx]

**SUPPLEMENTARY figure legends:**

**Supplementary Figure 1**.

Properties of gemcitabine-resistant (GEMR) cells and the effect of gemcitabine on these cells.Colony formation assay for BxPC3, BxPC3-GEMR and Panc1 cells to evaluate the sensitivity to gemcitabine (GEM).

**Supplementary Figure 2.**

Curcumin suppresses *Myc* expression in the parental BxPC3 and BxPC3-GEMR cells.qRT-PCR analysis to determine *Myc* expression levels in BxPC3 and BxPC3-GEMR cells with and without curcumin treatment. Abbreviations: Cur; curcumin, GEM; gemcitabine. Statistical significance; *P<0.05, **P<0.01.

**Supplementary Figure 3.**

Combined curcumin and gemcitabine treatment reduces the expression of *Myc* and *MDR1* in the xenograft tumors. qRT-PCR analysis to examine the expression of *Myc* and *MDR1* in xenograft tumors. Abbreviations: Cur; curcumin, GEM; gemcitabine. Statistical significance; *P<0.05, **P<0.01.
