# Supplementary material for: Curcumin sensitizes pancreatic cancer cells to gemcitabine by attenuating PRC2 subunit EZH2, and the lncRNA PVT1 expression
Source: Oxford University Press journal article supplement (doi:10.1093/carcin/bgx065), 2017-06-19
Supplement: bgx065_suppl_yoshida_etal_supplementary_table.docx [file bgx065_suppl_yoshida_etal_supplementary_table.docx]

| **Supplementary Table 1. Primer sets** | | |
| --- | --- | --- |
| Primer |  | Primer sequence |
| PVT1 | forward | 5'-TTG GGT CTC CCT ATG CAA TG-3' |
|  | reverse | 5'-GGA GAA TCC AGG GAG TA-3' |
| Nanog | forward | 5'-CCG AAG AAT AGC AAT GGT GTG ACG-3' |
|  | reverse | 5'-AGG AGA ATT TGG ATG GAA CTG C-3' |
| OCT4 | forward | 5'-ACA TCA AAG CTC TGC AGA AAC T-3' |
|  | reverse | 5'-CTG AAT ACC TTC CCA AAT AGA C-3' |
| CD44 | forward | 5'-CAA TAG CAC CTT GCC CAC AAT-3' |
|  | reverse | 5'-AAT CAC CAC GTG CCC TTC TAT GG-3' |
| CD133 | forward | 5'-ATG GCA ACA GCG ATC AAG G-3' |
|  | reverse | 5'-GTA CTT TGT TGG TGC AAG CTC T-3' |
| ALDH1 | forward | 5'-TCC TGG TTA TGG GCC TAC AG-3' |
|  | reverse | 5'-CTG GCC CTG GTG TAG AAT A-3' |
| Myc | forward | 5'-CGT CTC CAC ACA TCA GCA CAA-3' |
|  | reverse | 5'-TCT TGG CAG CAG GAT AGT CCT T-3' |
| MDR1 | forward | 5'-CCC ATC ATT GCA ATA GCA GG-3' |
|  | reverse | 5'-GTT CAA ACT TCT GCT CCT CA-3' |
| β-actin | forward | 5'-AGA GCT ACG AGC TGC CTG AC-3' |
|  | reverse | 5'-AGC ACT GTG TTG GCG TAC AG-3' |
| MALAT1 |  | Hs00273907_s1 |
| HOTAIR |  | Hs03296631 |
| ACTB (β-actin) |  | Hs01060665_g1 |

| **Supplementary Table 2. Antibody information** | |
| --- | --- |
| Antibody | Catalog number |
| PCNA | sc-56 (Santa Cruz) |
| p21 | sc-6246 (Santa Cruz) |
| Suz12 | D39F6 XP® (Cell signaling) |
| EZH2 | #39639 (ACTIVE MOTIF) |
| β-actin | A5443-100uL (SIGMA) |
